# Supplementary material
Source: MDPI journal article supplement (https://www.mdpi.com/2311-5637/9/6/577)
Supplement: s1 [file s1]

**Supplementary Materials:** The following supporting information can be downloaded at:

**Table S1.** The nutrients profile in MO and FMO

| Indexes                                | MO            | FMO           | Signification |
|----------------------------------------|---------------|---------------|---------------|
| Tannin nmol/g                          | 2144.96±37.06 | 1780.84±43.95 | -16.98%**     |
| Flavonoid mg/g                         | 15.88±0.31    | 12.82±0.14    | -19.27%**     |
| Total Phenols mg/g                     | 10.88±0.13    | 14.77±0.09    | +35.75%**     |
| DPPH radical scavenging rate %         | 76.23±1.98    | 90.52±4.69    | +18.75%**     |
| T-AOC nmol/g                           | 183.90±0.37   | 253.35±0.10   | +37.77%**     |
| Anti-superoxide anion activity U/gprot | 10.13±0.24    | 12.51±0.06    | +23.49%**     |
| Superoxide dismutase activity U/mgprot | 35.92±0.30    | 51.11±0.60    | +42.29%**     |

**Note:** "\*" indicates a significant difference between MO and FMO ( $P < 0.05$ , independent T-test); "\*\*" indicates an extremely significant difference between MO and FMO ( $P < 0.01$ , independent T-test).

**Abbreviation:** DPPH: 1,1-diphenyl-2-picrylhydrazyl, T-AOC: Total antioxidant capacity.

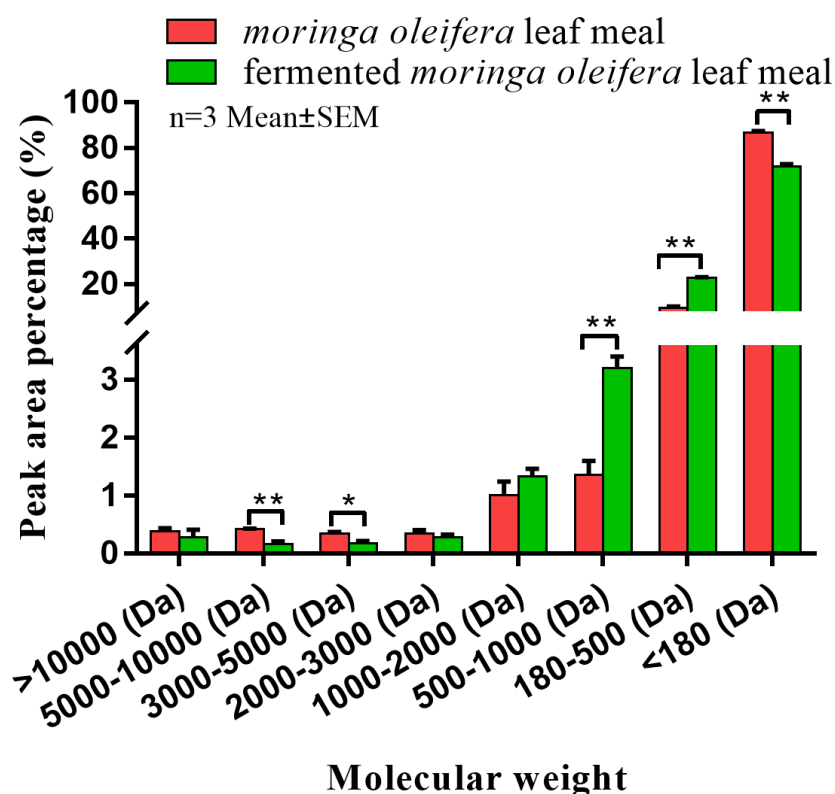

**Figure S1.** Molecular weight distribution of peptides in MO and FMO; \* indicates a significant difference ( $P < 0.05$ ; Independent T-test); \*\* indicates an extremely significant difference ( $P < 0.01$ ; Independent T-test).
